# Supplementary material for: Dehydrogenative homocoupling of tetrafluorobenzene on Pd(111) via para-selective C–H activation
Source: Royal Society of Chemistry journal article supplement (doi:10.1039/c7cc01476g), 2017-01-01
Supplement: c7cc01476g1.pdf [file c7cc01476g1.pdf]

# **Dehydrogenative homocoupling of tetrafluorobenzene on Pd(111) via para-selective C-H activation**

*Cheng-Xin Wang,<sup>a</sup> Qiao Jin,<sup>a</sup> Chen-Hui Shu,<sup>a</sup> Xin Hua,<sup>a</sup> Yi-Tao Long<sup>a</sup> and Pei-Nian Liu<sup>\*a</sup>*

*Shanghai Key Laboratory of Functional Materials Chemistry, Key Lab for Advanced Materials,  
State Key Laboratory of Chemical Engineering and School of Chemistry & Molecular  
Engineering, East China University of Science and Technology, 130 Meilong Road, Shanghai,  
200237, China*

*liupn@ecust.edu.cn*

## **Supporting Information**

- 1. General procedure for the calculation**
- 2. Reagent source**
- 3. Dehydrogenation energy and the side view of the Dimer**
- 4. General procedure for the ToF-SIMS measurement**

## 1. General procedure for the calculation

The calculations were carried out in the framework of DFT by using the Vienna Ab Initio Simulation Package (VASP).<sup>1,2</sup> The projector augmented wave method was used to describe the interaction between ions and electrons.<sup>3,4</sup> We used the generalized gradient approximation (GGA) with Perdew–Burke–Ernzerhof (PBE) formulism to treat exchange–correlation interaction,<sup>5</sup> and van der Waals (vdW) interactions were considered by using the DFT-D3 developed by Grimme.<sup>6</sup> The structures were relaxed until the forces on all unconstrained atoms were  $\leq 0.08$  eV/Å. All surfaces were modeled by two layered slabs separated by at least 15 Å of vacuum. A p(5×5) surface unit cell for Pd(111) was used for C-H reaction. Calculated lattice constants of 3.90 Å for Pd was used. All calculations were done with a 1×1×1 k-point sampling and a 400 eV kinetic energy cutoff. Transition-state calculations according to the nudged elastic band. The climbing-image nudged elastic band was applied to locate the transition state<sup>7</sup> and the transition path was optimized until the forces acting to the path were converged typically to  $\leq 0.08$  eV/Å.

## 2. Reagent source

1,2,4,5-Tetrafluorobenzene was bought from ALDRICH company (purity  $\geq 99\%$ )

## 3. Different views of the final state (FS) in Fig. 6b and dehydrogenation of the dimer of 1,2,4,5-tetrafluorobenzene

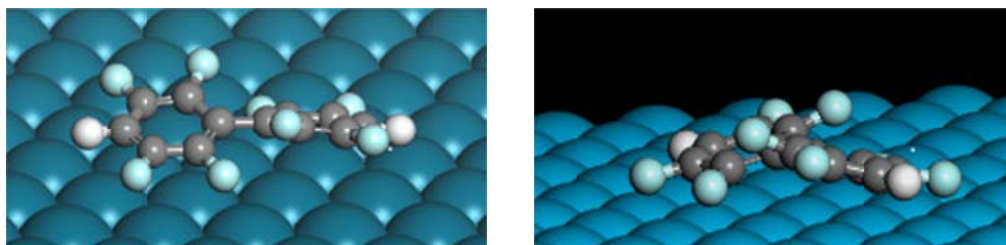

**Figure S1.** Different views of the final state (FS) in Fig. 6b

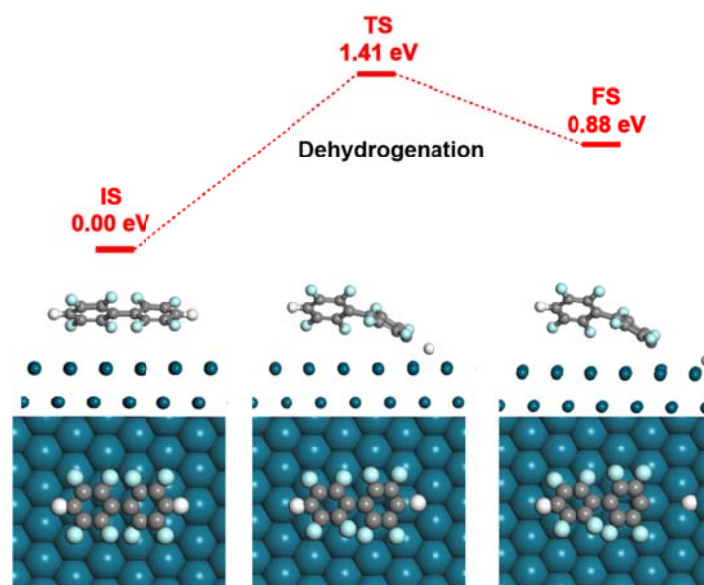

**Figure S2.** DFT-calculated energy diagrams for dehydrogenation of the dimer of 1,2,4,5-tetrafluorobenzene on Pd(111).

#### 4. General procedure for the ToF-SIMS measurement

ToF-SIMS experiments were performed using a ToF-SIMS V spectrometer (IONTOF GmbH, Münster, Germany). A pulsed 30 keV Bi<sup>+</sup> ion beam was used as the primary ion beam for all measurements. The analysis area was 500×500 μm. Target current was 1 pA. All data were obtained and analyzed using the IONTOF instrument software. Negative mass spectra were calibrated using C<sup>-</sup>, CH<sup>-</sup>, CH<sub>2</sub><sup>-</sup> and C<sub>2</sub><sup>-</sup> peaks.

#### References:

- (1) Kresse, G.; Hafner, J. *Phys. Rev. B* **1993**, *48*, 13115.
- (2) Kresse, G.; Furthmüller, J. *Phys. Rev. B* **1996**, *54*, 11169.
- (3) Blöchl, P. E. *Phys. Rev. B* **1994**, *50*, 17953.
- (4) Kresse, G.; Joubert, D. *Phys. Rev. B* **1999**, *59*, 1758.
- (5) Perdew, J. P.; Burke, K.; Ernzerhof, M. *Phys. Rev. Lett.* **1996**, *77*, 3865.
- (6) Grimme, S. *J. Comput. Chem.* **2006**, *27*, 1787.j
- (7) G. Henkelman, B. P. Uberuaga, H. Jonsson, *J. Chem. Phys.* **2000**, *113*, 9901.
